# Supplementary material for: Adaptation of hydroxymethylbutenyl diphosphate reductase enables volatile isoprenoid production
Source: eLife. 2020 Mar 12;9:e48685. doi: 10.7554/eLife.48685 (PMC7067565; doi:10.7554/eLife.48685)
Supplement: Figure 2—source data 1. [file elife-48685-fig2-data1.xlsx]

## Sheet: Proteins
				Sample #	F11	F12	F35	F36	F24	F41	F42		F3	F4	F20		F1	F17	F18		F8	F33	F34		F9	F10	F25	F26	F14	F37	F38		F15	F16	F39	F40	F29	F30	F45	F46	F27	F28	F43		F6	F21	F22		F31
Accession	Protein name	Description	# Peptides	Sample ID	SitchIP58_14	SitchIP59_14	SitchIP59_18	SitchIP60_18	Ara_44_15	Ara_44_18	Ara_45_18		Ecoli_40_14	Ecoli_41_14	Ecoli_42_15		empty_37_14	empty_38_15	empty_39_15		Cocoa_50_14	Cocoa_50_18	Cocoa_51_18		Grandis_55_14	Grandis_56_14	Grandis_56_15	Grandis_57_15	Synecho_68_14	Synecho_68_18	Synecho_69_18		Egui_76_14	Egui_77_14	Egui_77_18	Egui_78_18	Prunus_52_15	Prunus_53_15	Prunus_53_18	Prunus_54_18	SitchDM_A_15	SitchDM_B_15	SitchDM_C_18		Poplar_47_14	Poplar_47_15	Poplar_48_15		Rici_61_15
C0PQ69	Ps_HDR2	Uncharacterized protein OS=Picea sitchensis OX=3332 PE=2 SV=1	52		9.35213e+07	6.79013e+07	8.96709e+07	8.35383e+07	3.40862e+07	5.3648e+07	4.94952e+07		4.27623e+07	4.96956e+07	3.74315e+07		1.10504e+08	6.04709e+07	5.26461e+07		7.86049e+07	5.37059e+07	4.55615e+07		4.67038e+07	3.72027e+07	4.07262e+07	3.87586e+07	4.14939e+07	4.17812e+07	4.25686e+07		4.07748e+07	3.94428e+07	6.10436e+07	4.06655e+07	4.96342e+07	4.73701e+07	4.81292e+07	5.71173e+07	1.11525e+10	1.37263e+10	5.90083e+09		5.01576e+07	4.45319e+07	6.37732e+07		4.61917e+07
Eguineensis	E. guineensis	Eguineensis_EUCGR Uncharacterized protein OS=Eucalyptus grandis OX=71139 GN=EUGRSUZ_I01241 PE=3 SV=1	44		2.73204e+07	2.89773e+07	2.37515e+07	2.03052e+07	1.9387e+07	2.66658e+07	1.99601e+07		4.71367e+07	1.23845e+07	2.16219e+07		4.18387e+08	2.94692e+07	2.09825e+07		1.72299e+07	2.69599e+07	2.18074e+07		3.07745e+07	2.12519e+07	2.57561e+07	1.98258e+07	2.44833e+07	1.41402e+07	3.7446e+07		2.1961e+09	1.36723e+09	2.44958e+09	2.22558e+09	2.2537e+07	2.65233e+07	1.40905e+07	2.32999e+07	1.52192e+07	1.65712e+07	2.81361e+07		3.33199e+07	2.4169e+07	3.75698e+07		2.88541e+07
A0A059AMV0	E. grandis	Uncharacterized protein OS=Eucalyptus grandis OX=71139 GN=EUGRSUZ_I01241 PE=3 SV=1	43		6.37353e+06	7.19886e+06	6.93801e+06	6.59393e+06	5.99802e+06	6.47979e+06	6.66247e+06		6.19781e+06	7.13229e+06	7.91934e+06		1.175e+07	6.35159e+06	7.53413e+06		5.16558e+06	6.10235e+06	7.77678e+06		8.5368e+08	1.31369e+09	1.33957e+09	1.38322e+09	6.95348e+06	5.2879e+06	9.23171e+06		9.51487e+06	5.95866e+06	7.69867e+06	7.32286e+06	6.87733e+06	6.89106e+06	2.46732e+07	7.43215e+06	4.71652e+06	4.69491e+06	6.91537e+06		6.81355e+06	5.1851e+06	5.73786e+06		6.13222e+06
M5VJ05	P. persica	Uncharacterized protein OS=Prunus persica OX=3760 GN=PRUPE_8G105800 PE=3 SV=1	43		1.44756e+07	1.44101e+07	7.33182e+06	1.45539e+07	7.87006e+06	1.59451e+07	1.51222e+07		1.49364e+07	1.28847e+07	1.3073e+07		1.98777e+07	1.48586e+07	1.43718e+07		1.50018e+07	1.58306e+07	1.64706e+07		5.92922e+06	6.0711e+06	6.57816e+06	1.54296e+07	4.9724e+06	5.76871e+06	5.88279e+06		1.2946e+07	5.35083e+06	6.43616e+06	1.78993e+07	9.81465e+08	9.64159e+08	1.05686e+09	9.5481e+08	1.42551e+07	1.63714e+07	1.0866e+07		1.78951e+07	5.79204e+06	6.32448e+06		2.07768e+07
A0A061E8E2	T. cacao	4-hydroxy-3-methylbut-2-enyl diphosphate reductase isoform 1 OS=Theobroma cacao OX=3641 GN=TCM_007277 PE=3 SV=1	43		2.87281e+06	2.7652e+06	1.02783e+07	6.69623e+06	1.94938e+06	1.16897e+07	3.16945e+06		3.57134e+06	3.5785e+06	4.15823e+06		5.71804e+07	4.22183e+06	2.90987e+06		1.56086e+09	1.77286e+09	1.12935e+09		4.90962e+06	8.2837e+06	3.89518e+06	6.34197e+06	3.41865e+06	4.36704e+06	7.89015e+06		4.96275e+06	2.53992e+06	1.15184e+07	1.10825e+07	1.52723e+06	4.96855e+06	1.90858e+06	5.6462e+06	2.01604e+06	2.46234e+06	9.41565e+06		3.97122e+06	9.22394e+06	8.12118e+06		2.00086e+06
C0PR44	Ps_HDR1	Uncharacterized protein OS=Picea sitchensis OX=3332 PE=2 SV=1	44		5.15415e+09	3.8672e+09	5.25192e+09	4.43499e+09	2.64989e+07	2.14429e+07	1.84082e+07		3.17348e+07	1.63838e+07	2.10971e+07		2.72927e+08	2.05538e+07	1.99028e+07		1.78291e+07	2.60484e+07	1.79699e+07		1.8918e+07	1.9014e+07	1.98024e+07	2.06163e+07	2.0155e+07	1.87913e+07	2.66089e+07		1.80159e+07	1.75437e+07	2.2608e+07	2.11297e+07	2.16514e+07	2.24339e+07	1.96488e+07	2.08061e+07	1.60778e+07	2.12355e+07	2.79726e+07		2.06019e+07	1.90025e+07	2.91634e+07		2.42861e+07
B1XPG7	Synechococcus	4-hydroxy-3-methylbut-2-enyl diphosphate reductase OS=Synechococcus sp. (strain ATCC 27264 / PCC 7002 / PR-6) OX=32049 GN=ispH PE=3 SV=1	28		4.0559e+06	4.66221e+06	4.13087e+06	4.54654e+06	2.60954e+06	6.22165e+06	5.37481e+06		9.36601e+06	2.47703e+06	5.53572e+06		5.85429e+07	4.95116e+06	5.78443e+06		1.09622e+07	1.01667e+07	6.31741e+06		4.79578e+06	2.93575e+06	4.96499e+06	5.02578e+06	2.46094e+09	1.95293e+09	2.81109e+09		7.44493e+06	2.59469e+06	6.37572e+06	7.98724e+06	4.08183e+06	7.4619e+06	7.46814e+06	7.01763e+06	3.13698e+06	6.55473e+06	5.82928e+06		5.82565e+06	6.32221e+06	1.06039e+07		5.93404e+06
B3GEM6	P. trichocarpa	Putative chloroplast 4-hydroxy-3-methylbut-2-en-1-yl diphosphate reductase (Fragment) OS=Populus trichocarpa OX=3694 GN=HDR PE=2 SV=1	37		855062		521890			1.10668e+06			551968				2.61443e+06	665321							4.90813e+06	842600					437121		5.62167e+06					715404	3.39568e+06	1.01779e+06		6.59653e+06	2.54949e+06		3.63583e+08	3.40806e+08	4.35527e+08
B9RZD3	R. communis	4-hydroxy-3-methylbut-2-enyl diphosphate reductase, putative OS=Ricinus communis OX=3988 GN=RCOM_0938310 PE=3 SV=1	38		9.59406e+06	1.14943e+07	1.31521e+07	1.06055e+06	1.23362e+07	1.12288e+07	1.30009e+06		1.73494e+06	1.42114e+06	1.51922e+06		6.28734e+06	1.77594e+06	1.30791e+06		1.0114e+07	6.82636e+06	1.57064e+06		1.70093e+06	1.99e+06	1.04471e+07	1.1395e+06	8.52618e+06	1.22038e+06	1.59561e+06		2.57396e+06	9.46705e+06	1.33696e+07	1.58093e+07	8.45232e+06	1.6487e+06	1.02977e+07	938589	3.22659e+06	1.29029e+07	1.61571e+07		631947	7.96357e+06	1.12781e+07		4.17523e+08
E0IYZ8	E. coli ispH	4-hydroxy-3-methylbut-2-enyl diphosphate reductase OS=Escherichia coli (strain ATCC 9637 / CCM 2024 / DSM 1116 / NCIMB 8666 / NRRL B-766 / W) OX=566546 GN=ispH PE=3 SV=1	30		9.19242e+07	8.66721e+07	8.69895e+07	9.43488e+07	9.11241e+07	9.67995e+07	9.2575e+07		6.746e+09	6.27474e+09	7.06281e+09		1.29147e+08	9.24757e+07	9.61958e+07		8.93003e+07	8.54097e+07	8.78863e+07		7.93381e+07	8.59948e+07	9.73091e+07	9.63194e+07	9.63147e+07	9.18819e+07	9.63751e+07		8.10654e+07	8.84351e+07	9.11938e+07	8.8992e+07	9.60759e+07	9.93107e+07	9.28827e+07	9.16993e+07	8.58683e+07	8.00332e+07	9.41455e+07		1.02152e+08	9.6973e+07	9.60995e+07		1.05112e+08
Q94B35	A. thaliana	4-hydroxy-3-methylbut-2-enyl diphosphate reductase, chloroplastic OS=Arabidopsis thaliana OX=3702 GN=ISPH PE=1 SV=1	38		1.76634e+06	1.86012e+06	908349	1.21356e+06	1.34907e+09	1.08224e+09	1.0809e+09		2.51827e+06	230678	3.68098e+06		4.66316e+07	1.8435e+06	4.50028e+06		3.04017e+06	2.96647e+06	2.85191e+06		1.54663e+06	837598	804781	1.21762e+06	2.25077e+06	1.15183e+06	5.42319e+06		2.32103e+06	5.27858e+06	728354	1.98485e+06	2.90224e+06	534295	5.59665e+06	1.4225e+06	1.33132e+06	3.39666e+06	2.33591e+06		1.68247e+06	5.22296e+06	3.58018e+06		5.07691e+06
E0IWC4	E. coli idi	Isopentenyl-diphosphate Delta-isomerase OS=Escherichia coli (strain ATCC 9637 / CCM 2024 / DSM 1116 / NCIMB 8666 / NRRL B-766 / W) OX=566546 GN=idi PE=3 SV=1	1		810127	861366	1.20738e+06	994577	1.03741e+06	788819	759240		894399	475535	748514		1.90891e+06	614872	786745		701078	987129	860879		624570	833638	846170	1.20826e+06	805646	777210	800839		1.16474e+06	950354	1.05393e+06	927088	1.33001e+06	804610	996406	902251	1.20663e+06	930444	1.06319e+06		1.06487e+06	863553	1.07729e+06		1.19064e+06
O81659	pLYC idi	O81659_HAELA Isopentenyl pyrophosphate:dimethylallyl pyrophosphate isomerase OS=Haematococcus lacustris OX=44745 GN=ipiHp1 PE=2 SV=1	3		621876	423042	2.61304e+06	966649	897002	729481	664261		468603	1.6828e+06	633733		6.09606e+06	1.32457e+06	1.0111e+06		2.12362e+06	955007	1.69553e+06				804703	990407	601628	1.22701e+06				1.09037e+06	254733		1.34295e+06		1.37814e+06		3.8335e+06	525733			243079		589694		897901
crtB	pLYC CrtB	crtB_crtB Uncharacterized protein OS=Eucalyptus grandis OX=71139 GN=EUGRSUZ_I01241 PE=3 SV=1	7		7.51827e+06	5.3404e+06	7.56062e+06	7.16878e+06	7.94666e+06	8.02764e+06	8.3599e+06		7.48456e+06	6.74387e+06	1.0407e+07		5.29364e+06	9.70317e+06	6.75057e+06		6.32397e+06	7.46738e+06	7.90748e+06		6.83158e+06	4.54193e+06	5.37285e+06	9.63537e+06	7.07053e+06	9.63839e+06	8.82782e+06		1.03983e+07	7.32149e+06	8.68703e+06	8.02179e+06	1.36484e+07	7.86244e+06	9.426e+06	9.18171e+06	1.1781e+07	9.00121e+06	5.53227e+06		1.19809e+07	8.77534e+06	1.16506e+07		1.10416e+07
CrtI	pLYC CrtI	CrtI_CrtI Uncharacterized protein OS=Eucalyptus grandis OX=71139 GN=EUGRSUZ_I01241 PE=3 SV=1	12		1.85082e+07	1.75373e+07	1.94747e+07	1.47067e+07	2.63222e+07	1.62744e+07	1.78582e+07		1.86548e+07	1.82432e+07	2.55832e+07		1.12639e+07	2.58695e+07	2.20675e+07		1.97577e+07	2.27681e+07	2.17934e+07		1.50127e+07	1.68861e+07	1.4114e+07	2.3791e+07	2.32462e+07	2.95159e+07	2.17945e+07		2.72607e+07	2.41541e+07	2.18707e+07	1.48259e+07	3.18335e+07	2.02482e+07	2.82201e+07	2.22043e+07	2.81608e+07	2.57877e+07	1.32338e+07		2.98183e+07	2.20378e+07	2.63343e+07		2.89184e+07
crtE	pLYC CrtE	crtE_crtE Uncharacterized protein OS=Eucalyptus grandis OX=71139 GN=EUGRSUZ_I01241 PE=3 SV=1	3		1.03508e+06	446382	1.02414e+06	733450	811074	238775	224296		815563	850375	1.65654e+06			634203	1.04747e+06		978070	762122	802806		276163	343541	260463	529416	906122	1.23158e+06	555012		772410	826202	765610	635268	1.45322e+06	708663	1.0938e+06	441200	1.07796e+06	202078	287438		1.26572e+06	1.28794e+06	1.39425e+06		969241
Overexpression strains
HDR Protein name	Strain name
Ps_HDR2	SitchDM
E. guineensis	Egui
E. grandis	Grandis
P. persica	Prunus
T. cacao	Cacoa
Ps_HDR1	SitchIP
Synechococcus	Synecho
P. trichocarpa	Poplar
R. communis	Rici
E. coli ispH	E. coli
A. thaliana	Ara
empty control	empty
[truncated: 2 more columns]

## Sheet: IPP DMAPP
							Normalized by dilution factor			Ratio				Sum			DMAPP		IPP		Actual cellular concentration (uM)
Sample #	Sample ID	Strain	#	Date	DMAPP Conc. (uM)	IPP Conc. (uM)	DMAPP Conc. (uM)	IPP Conc. (uM)	Ratio DMAPP/IPP	Average	SD	RSD%	SUM (IPP+DMAPP)	AVG	SD	RSD%	DMAPP (uM)	SD	IPP (uM)	SD	DMAPP	SD	IPP	SD		100	ul	sample volume
11	SitchIP58_14	Sitch IPP	58	2019-09-14	0.097	0.225	0.10185	0.23625	0.431111	0.446926	0.191472	42.842	0.322	0.62075	0.23375	37.656	0.198188	0.112712	0.4536	0.17529	1.10104	0.626178	2.52	0.973835		5	ml*OD	cells sampled
12	SitchIP59_14	Sitch IPP	59	2019-09-14	0.344	0.483	0.3612	0.50715	0.712215				0.827
35	SitchIP59_18	Sitch IPP	59	2019-09-18	0.161	0.624	0.16905	0.6552	0.258013				0.785													According to Volkmer et al 2011:
36	SitchIP60_18	Sitch IPP	60	2019-09-18	0.153	0.396	0.16065	0.4158	0.386364				0.549													3.6	ul cell volume per ml per OD
3	Ecoli_40_14	E.coli	40	2019-09-14	0.157	0.116	0.16485	0.1218	1.35345	1.41682	0.219326	15.4802	0.273	0.366	0.134851	36.8444	0.21125	0.0684513	0.15475	0.067064	1.17361	0.380285	0.859722	0.372578
4	Ecoli_41_14	E.coli	41	2019-09-14	0.207	0.155	0.21735	0.16275	1.33548				0.362
19	Ecoli_41_15	E.coli	41	2019-09-15	0.309	0.249	0.32445	0.26145	1.24096				0.558													18	ul cell volume per 5ml*OD
20	Ecoli_42_15	E.coli	42	2019-09-15	0.172	0.099	0.1806	0.10395	1.73737				0.271													5.55556	dilution factor in sample
23	Ara_43_15	Arabidopsi	43	2019-09-15	0.661	0.39	0.69405	0.4095	1.69487	1.53495	0.145641	9.48832	1.051	0.66575	0.419893	63.0707	0.4095	0.268743	0.25625	0.15124	2.275	1.49302	1.42361	0.840223
24	Ara_44_15	Arabidopsi	44	2019-09-15	0.622	0.384	0.6531	0.4032	1.61979				1.006
41	Ara_44_18	Arabidopsi	44	2019-09-18	0.16	0.115	0.168	0.12075	1.3913				0.275
42	Ara_45_18	Arabidopsi	45	2019-09-18	0.195	0.136	0.20475	0.1428	1.43382				0.331
1	empty_37_14	empty	37	2019-09-14	0.194	0.166	0.2037	0.1743	1.16867	1.68067	0.443536	26.3904	0.36	0.497	0.13015	26.1871	0.313333	0.109436	0.183667	0.0232451	1.74074	0.60798	1.02037	0.129139
2	empty_38_14	empty	38	2019-09-14	0.337	0.175	0.35385	0.18375	1.92571				0.512
17	empty_38_15	empty	38	2019-09-15
18	empty_39_15	empty	39	2019-09-15	0.409	0.21	0.42945	0.2205	1.94762				0.619
7	Cocoa_49_14	Cocoa	49	2019-09-14	0.956	0.276	1.0038	0.2898	3.46377	2.63906	0.688471	26.0877	1.232	0.81475	0.35684	43.7975	0.598	0.296107	0.21675	0.0652859	3.32222	1.64504	1.20417	0.362699
8	Cocoa_50_14	Cocoa	50	2019-09-14	0.663	0.226	0.69615	0.2373	2.93363				0.889
33	Cocoa_50_18	Cocoa	50	2019-09-18	0.53	0.241	0.5565	0.25305	2.19917				0.771
34	Cocoa_51_18	Cocoa	51	2019-09-18	0.243	0.124	0.25515	0.1302	1.95968				0.367
9	Grandis_55_14	E.grandis	55	2019-09-14	1.067	0.299	1.12035	0.31395	3.56856	5.97905	1.72798	28.9007	1.366	1.2245	0.458569	37.4495	1.03225	0.379141	0.19225	0.100662	5.73472	2.10634	1.06806	0.559235
10	Grandis_56_14	E.grandis	56	2019-09-14	1.454	0.247	1.5267	0.25935	5.88664				1.701
25	Grandis_56_15	E.grandis	56	2019-09-15	1.076	0.15	1.1298	0.1575	7.17333				1.226
26	Grandis_57_15	E.grandis	57	2019-09-15	0.532	0.073	0.5586	0.07665	7.28767				0.605
13	Synecho_67_14	Synecho	67	2019-09-14	0.621	0.137	0.65205	0.14385	4.53285	5.14345	0.597267	11.6122	0.758	0.87925	0.190181	21.6299	0.7345	0.156146	0.14475	0.0361974	4.08056	0.867479	0.804167	0.201097
14	Synecho_68_14	Synecho	68	2019-09-14	0.58	0.098	0.609	0.1029	5.91837				0.678
37	Synecho_68_18	Synecho	68	2019-09-18	0.884	0.182	0.9282	0.1911	4.85714				1.066
38	Synecho_69_18	Synecho	69	2019-09-18	0.853	0.162	0.89565	0.1701	5.26543				1.015
15	Egui_76_14	E. guin	76	2019-09-14	0.953	0.151	1.00065	0.15855	6.31126	6.28581	1.74962	27.8345	1.104	1.0945	0.315939	28.8661	0.92575	0.214005	0.16875	0.103474	5.14306	1.18892	0.9375	0.574857
16	Egui_77_14	E. guin	77	2019-09-14	1.217	0.32	1.27785	0.336	3.80313				1.537
39	Egui_77_18	E. guin	77	2019-09-18	0.79	0.105	0.8295	0.11025	7.52381				0.895
40	Egui_78_18	E. guin	78	2019-09-18	0.743	0.099	0.78015	0.10395	7.50505				0.842
29	Prunus_52_15	Prunus	52	2019-09-15	0.544	0.064	0.5712	0.0672	8.5	9.3853	2.15546	22.9663	0.608	1.25775	0.934727	74.3174	1.1455	0.874555	0.11225	0.0611467	6.36389	4.85864	0.623611	0.339704
30	Prunus_53_15	Prunus	53	2019-09-15	0.464	0.062	0.4872	0.0651	7.48387				0.526
45	Prunus_53_18	Prunus	53	2019-09-18	1.219	0.134	1.27995	0.1407	9.09701				1.353
46	Prunus_54_18	Prunus	54	2019-09-18	2.355	0.189	2.47275	0.19845	12.4603				2.544
27	SitchDA_15	Sitch DMAPP	A	2019-09-15	0.712	0.074	0.7476	0.0777	9.62162	11.3434	3.54911	31.2879	0.786	1.055	0.406769	38.5563	0.97025	0.398884	0.08475	0.0135984	5.39028	2.21602	0.470833	0.0755467
28	SitchDB_15	Sitch DMAPP	B	2019-09-15	1.565	0.096	1.64325	0.1008	16.3021				1.661
43	SitchDC_18	Sitch DMAPP	C	2019-09-18	0.814	0.072	0.8547	0.0756	11.3056				0.886
44	SitchDD_18	Sitch DMAPP	D	2019-09-18	0.79	0.097	0.8295	0.10185	8.14433				0.887
5	Poplar_46_14	Poplar	46	2019-09-14	0.412	0.059	0.4326	0.06195	6.98305	17.1697	8.61268	50.1622	0.471	1.64825	0.998849	60.6006	1.5635	0.978991	0.08475	0.0222017	8.68611	5.43884	0.470833	0.123343
6	Poplar_47_14	Poplar	47	2019-09-14	2.327	0.112	2.44335	0.1176	20.7768				2.439
21	Poplar_47_15	Poplar	47	2019-09-15	2.425	0.09	2.54625	0.0945	26.9444				2.515
22	Poplar_48_15	Poplar	48	2019-09-15	1.09	0.078	1.1445	0.0819	13.9744				1.168
31	Rici_61_15	Ricinus	61	2019-09-15	1.33	0.077	1.3965	0.08085	17.2727	17.885	3.47236	19.4149	1.407	1.5795	0.293656	18.5917	1.49575	0.292819	0.08375	0.00531507	8.30972	1.62677	0.465278	0.0295282
32	Rici_62_15	Ricinus	62	2019-09-15	1.929	0.084	2.02545	0.0882	22.9643				2.013
47	Rici_62_18	Ricinus	62	2019-09-18	1.306	0.084	1.3713	0.0882	15.5476				1.39
48	Rici_63_18	Ricinus	63	2019-09-18	1.418	0.09	1.4889	0.0945	15.7556				1.508
																				min	1.10104		0.465278
																				max	8.68611		2.52

## Sheet: Isoprene
	Isoprene (uM)	SD		HDR counts
Ps_HDR1	1.3212	0.5872		4675000000
E. coli	0	0		1170000000
A. thal	0	0		6.69333e+09
(-)	0	0
T. cacao	0	0		1.48667e+09
E. grand	5.09371	2.0552		1221000000
Syn 7002	4.1104	3.9636		2.40667e+09
E. gui 1	4.6976	4.2572		2062500000
P. pers	21.5796	1.0276		990000000
Ps_HDR2	2.36348	1.1744		1.02667e+10
P. tricho	23.6348	4.2572		3.80333e+08
R. comm	31.4152	4.6976		452000000
